# Supplementary material for: Phenotypic Plasticity of Common Wasps in an Industrially Polluted Environment in Southwestern Finland
Source: MDPI journal article supplement (doi:10.3390/insects12100888), 2021-09-30
Supplement: s1 [file s1]

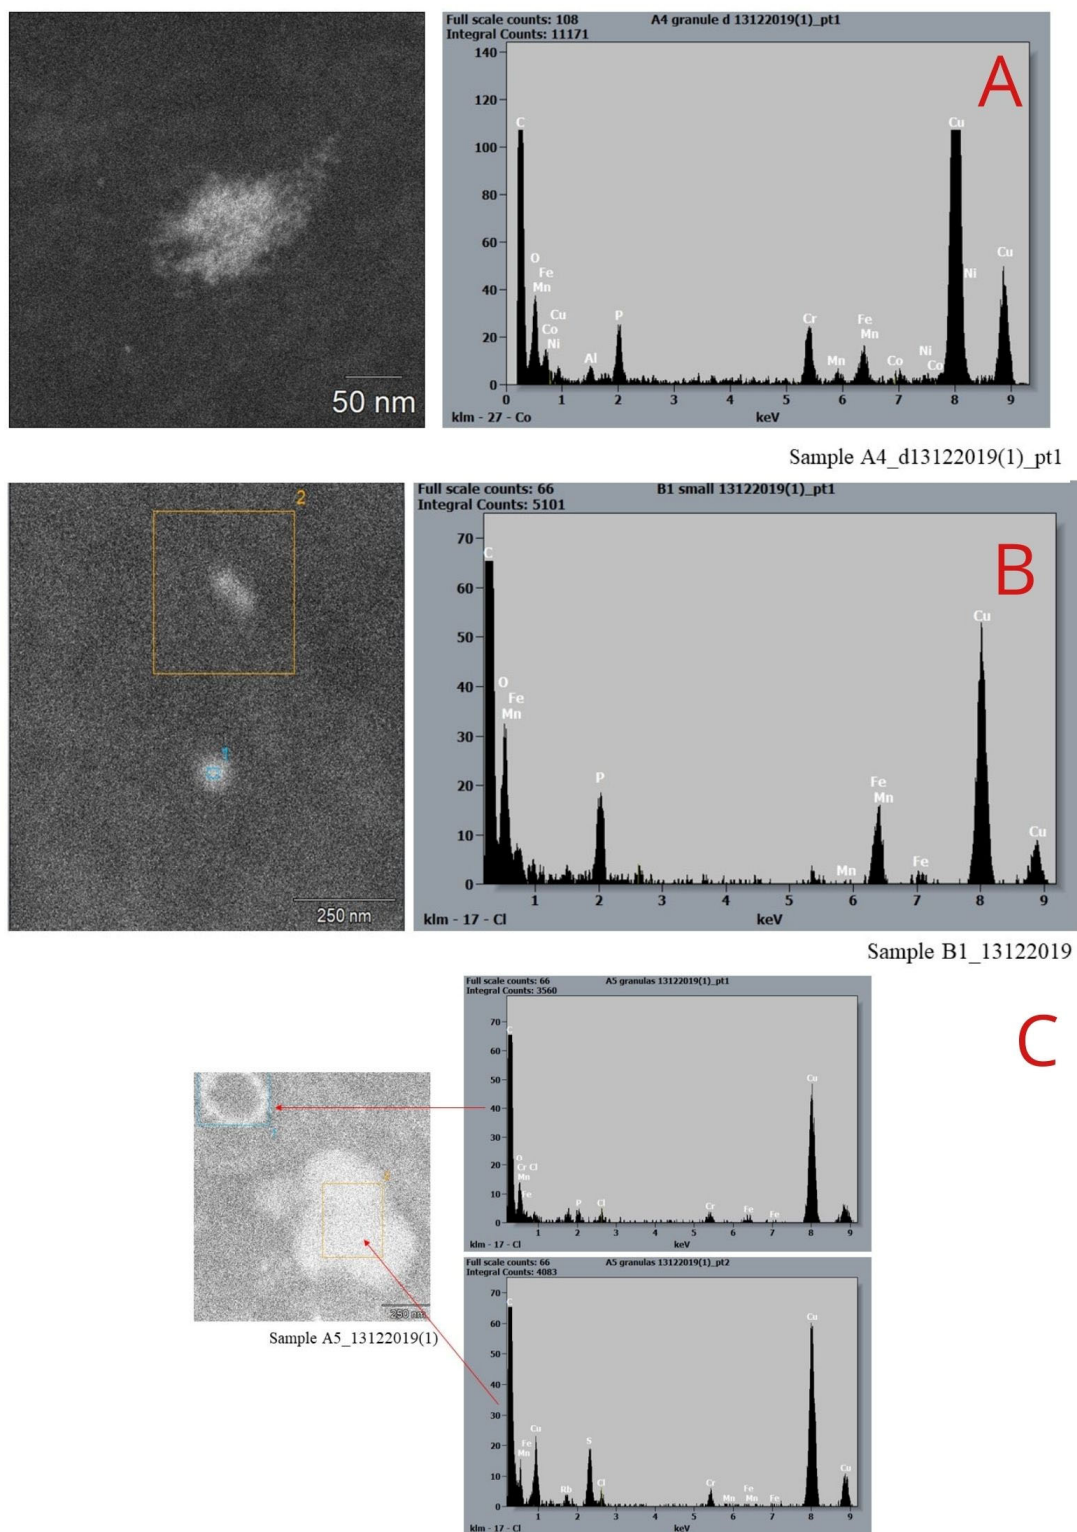

**Figure S1.** EDX spectrum for three samples (individuals) of *V. vulgaris* guts captured in polluted environments in vicinity of Harjavalta Cu–Ni smelter. Letters A–C indicate the wasps' ID num-bers.
